# Supplementary material for: Photocatalytic Phenol Degradation by Silica-Modified Titanium Dioxide
Source: MDPI journal article supplement (doi:10.3390/app11199033), 2021-09-28
Supplement: s1 [file s1]

## Supplementary Data

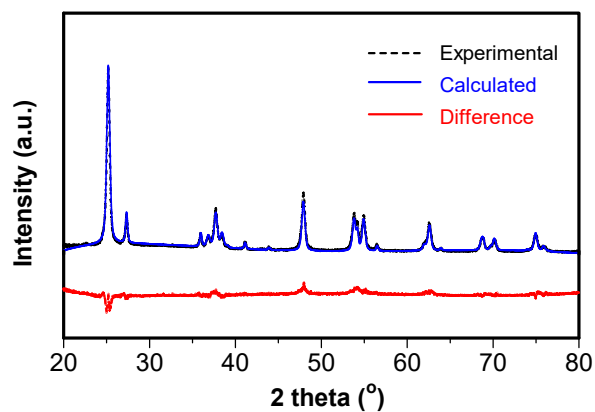

Figure S1. Rietveld refinement of XRD pattern of TiO<sub>2</sub> P25.

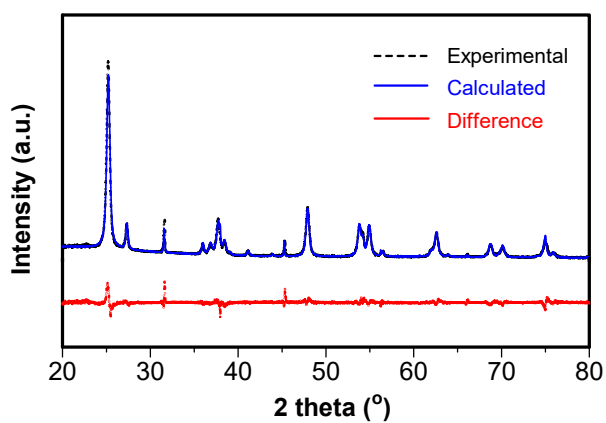

Figure S2. Rietveld refinement of XRD pattern of composite TiO<sub>2</sub>/SiO<sub>2</sub> 1:1.

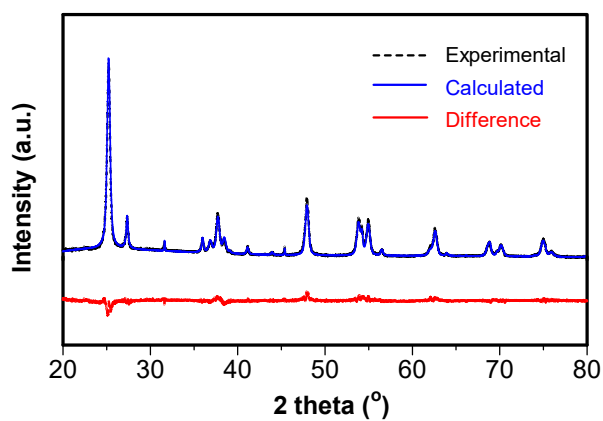

Figure S3. Rietveld refinement of XRD pattern of composite TiO<sub>2</sub>/SiO<sub>2</sub> 3:1.

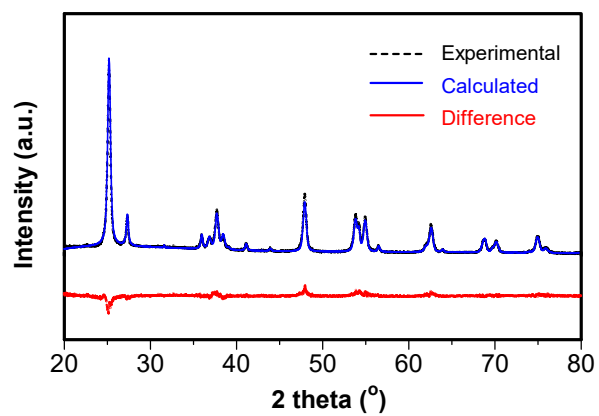

Figure S4. Rietveld refinement of XRD pattern of composite  $\text{TiO}_2/\text{SiO}_2$  7:1.
